# Supplementary material for: Bacterial Communities in Alkaline Saline Soils Amended with Young Maize Plants or Its (Hemi)Cellulose Fraction
Source: MDPI journal article supplement (doi:10.3390/microorganisms9061297), 2021-06-15
Supplement: s1 [file s1]

**Table S3.** Effect of soil with EC 1.9 dS<sup>-1</sup> (low), 17.3 dS<sup>-1</sup> (medium), 33.4 dS<sup>-1</sup> (high) on bacterial phyla and genera in the unamended soil, soil amended with neutral detergent fibre (NDF) and soil amended with young maize plants using a compositional approach, i.e. analysis of differential abundance taking sample variation into account ALDEx2 package [39].

| Unamended <sup>a</sup> |                      | NDF treatment          |        | Young maize plants     |        |
|------------------------|----------------------|------------------------|--------|------------------------|--------|
| <i>Prauseria</i>       | 0.00009 <sup>b</sup> | <i>Xylanimicrobium</i> | 0.0360 | <i>KSA1</i>            | 0.0070 |
| <i>Rhodoplanes</i>     | 0.0001               |                        |        | <i>Prauseria</i>       | 0.0084 |
| <i>KSA1</i>            | 0.0001               |                        |        | <i>Lysobacter</i>      | 0.0089 |
| <i>Lysobacter</i>      | 0.0001               |                        |        | <i>Alkaliphilus</i>    | 0.0094 |
| <i>Pseudomonas</i>     | 0.0001               |                        |        | <i>Euzebya</i>         | 0.0121 |
| <i>Steroidobacter</i>  | 0.0001               |                        |        | <i>Nocardioides</i>    | 0.0121 |
| <i>Halomonas</i>       | 0.0001               |                        |        | <i>Halomonas</i>       | 0.0137 |
| <i>Euzebya</i>         | 0.0001               |                        |        | <i>Devosia</i>         | 0.0156 |
| <i>B-42</i>            | 0.0002               |                        |        | <i>B-42</i>            | 0.0160 |
| <i>Acinetobacter</i>   | 0.0002               |                        |        | <i>Anaerobacillus</i>  | 0.0171 |
| <i>Rhodobaca</i>       | 0.0002               |                        |        | <i>Pseudomonas</i>     | 0.0198 |
| <i>Devosia</i>         | 0.0003               |                        |        | <i>Desulfonatronum</i> | 0.0230 |
| <i>Desulfonatronum</i> | 0.0003               |                        |        | <i>Steroidobacter</i>  | 0.0240 |
| <i>Nocardioides</i>    | 0.0003               |                        |        | <i>Dethiobacter</i>    | 0.0322 |
| <i>Cobetia</i>         | 0.0003               |                        |        | <i>Bacillus</i>        | 0.0359 |
| <i>Pedomicrobium</i>   | 0.0003               |                        |        | <i>Bradyrhizobium</i>  | 0.0360 |
| <i>Marinimicrobium</i> | 0.0004               |                        |        |                        |        |
| <i>Alkaliphilus</i>    | 0.0005               |                        |        |                        |        |
| <i>Balneimonas</i>     | 0.0005               |                        |        |                        |        |
| <i>Adhaeribacter</i>   | 0.0005               |                        |        |                        |        |

<sup>a</sup> Only the twenty bacterial genera in the unamended soil most highly significantly affected  $p < 0.001$ . <sup>b</sup> Significance was measured using ALDEx2 and based on the Benjamini-Hochberg corrected  $p$  value of the Kruskal-Wallis test (significance threshold,  $p < 0.05$ ).
