# Supplementary material for: Bacterial Communities in Alkaline Saline Soils Amended with Young Maize Plants or Its (Hemi)Cellulose Fraction
Source: MDPI journal article supplement (doi:10.3390/microorganisms9061297), 2021-06-15
Supplement: s1 [file s1]

Table S1. Characteristics of organic material used in the aerobic incubation experiment <sup>a</sup>.

|                          | Soluble<br>fraction                     | Lignin<br>content | (Hemi)<br>cellulose | Polyphenols | Ash       | Total<br>N | Total C   |
|--------------------------|-----------------------------------------|-------------------|---------------------|-------------|-----------|------------|-----------|
|                          | (g kg <sup>-1</sup> dry plant material) |                   |                     |             |           |            |           |
| Young<br>maize<br>plants | 599 (6.5) <sup>b</sup>                  | 25 (1.1)          | 311 (8.0)           | 2 (0.2)     | 62 (2.3)  | 34 (0.6)   | 422 (1.9) |
| NDF <sup>c</sup>         | 0                                       | 63 (2.8)          | 776 (15.4)          | 6 (0.4)     | 155 (2.9) | 19 (0.5)   | 405 (1.8) |

<sup>a</sup> Data derived from Ramirez-Villanueva et al. [12], <sup>b</sup> Value between parentheses is the standard deviation; <sup>c</sup> NDF: Neutral detergent fibre.
