# Supplementary material for: Bacterial Communities in Alkaline Saline Soils Amended with Young Maize Plants or Its (Hemi)Cellulose Fraction
Source: MDPI journal article supplement (doi:10.3390/microorganisms9061297), 2021-06-15
Supplement: s1 [file s1]

**Table S5.** Effect of treatment (unamended soil, amended soil with young maize plants or its neutral detergent fibre) and effect of soil (EC: 1.9 dS m<sup>-1</sup>, 17.3 dS m<sup>-1</sup>, 33.4 dS m<sup>-1</sup>) on bacterial phyla or genera using a compositional approach, i.e. analysis of differential abundance taking sample variation into account (ALDEx2 package [39]).

| Soil <sup>a</sup>      |                                     | Treatment             |                       |
|------------------------|-------------------------------------|-----------------------|-----------------------|
| Phyla                  |                                     |                       |                       |
| Acidobacteria          | 2.99×10 <sup>-10</sup> <sup>b</sup> | Verrucomicrobia       | 1.00×10 <sup>-4</sup> |
| Firmicutes             | 9.63×10 <sup>-8</sup>               | Proteobacteria        | 1.00×10 <sup>-4</sup> |
| Gemmatimonadetes       | 1.10×10 <sup>-6</sup>               | Planctomycetes        | 3.00×10 <sup>-4</sup> |
| Bacteroidetes          | 5.77×10 <sup>-7</sup>               | Actinobacteria        | 5.00×10 <sup>-4</sup> |
| [Thermi]               | 2.92×10 <sup>-7</sup>               | Chloroflexi           | 8.00×10 <sup>-4</sup> |
| Proteobacteria         | 5.00×10 <sup>-4</sup>               | Gemmatimonadetes      | 3.10×10 <sup>-3</sup> |
| Actinobacteria         | 3.00×10 <sup>-4</sup>               | Bacteroidetes         | 4.80×10 <sup>-3</sup> |
| Armatimonadetes        | 1.00×10 <sup>-4</sup>               | Nitrospirae           | 9.20×10 <sup>-3</sup> |
| Spirochaetes           | 1.70×10 <sup>-3</sup>               | NC10                  | 3.62×10 <sup>-2</sup> |
| Chloroflexi            | 1.30×10 <sup>-3</sup>               |                       |                       |
| Genera                 |                                     |                       |                       |
| <i>Halomonas</i>       | 9.35×10 <sup>-9</sup>               | <i>Acinetobacter</i>  | 3.14×10 <sup>-7</sup> |
| <i>Lysobacter</i>      | 1.10×10 <sup>-8</sup>               | <i>Prauseria</i>      | 4.62×10 <sup>-7</sup> |
| <i>KSA1</i>            | 1.14×10 <sup>-8</sup>               | <i>Variovorax</i>     | 4.32×10 <sup>-6</sup> |
| <i>Euzebya</i>         | 1.36×10 <sup>-8</sup>               | <i>Streptomyces</i>   | 5.70×10 <sup>-6</sup> |
| <i>Xylanimicrobium</i> | 2.10×10 <sup>-8</sup>               | <i>Glycomyces</i>     | 6.60×10 <sup>-6</sup> |
| <i>Alkaliphilus</i>    | 3.37×10 <sup>-8</sup>               | <i>Pseudomonas</i>    | 2.82×10 <sup>-5</sup> |
| <i>Nocardioides</i>    | 6.98×10 <sup>-8</sup>               | <i>Marinobacter</i>   | 8.93×10 <sup>-5</sup> |
| <i>Prauseria</i>       | 1.15×10 <sup>-7</sup>               | <i>Azorhizophilus</i> | 2.00×10 <sup>-3</sup> |
| <i>Pseudomonas</i>     | 6.74×10 <sup>-7</sup>               | <i>Williamsia</i>     | 1.00×10 <sup>-3</sup> |
| <i>Anaerobacillus</i>  | 6.77×10 <sup>-7</sup>               | <i>Bacillus</i>       | 7.00×10 <sup>-3</sup> |
| <i>Rhodobaca</i>       | 9.60×10 <sup>-7</sup>               | <i>Nitriliruptor</i>  | 4.70×10 <sup>-3</sup> |
| <i>Steroidobacter</i>  | 1.12×10 <sup>-6</sup>               | <i>Nesterenkonia</i>  | 6.40×10 <sup>-3</sup> |
| <i>Desulfonatronum</i> | 1.30×10 <sup>-6</sup>               |                       |                       |
| <i>Devosia</i>         | 1.53×10 <sup>-6</sup>               |                       |                       |
| <i>B-42</i>            | 2.67×10 <sup>-6</sup>               |                       |                       |
| <i>Rhodoplanes</i>     | 5.57×10 <sup>-6</sup>               |                       |                       |
| <i>Dethiobacter</i>    | 1.40×10 <sup>-5</sup>               |                       |                       |
| <i>Hyphomicrobium</i>  | 2.61×10 <sup>-5</sup>               |                       |                       |
| <i>Pedomicrobium</i>   | 4.11×10 <sup>-5</sup>               |                       |                       |
| <i>Adhaeribacter</i>   | 4.63×10 <sup>-5</sup>               |                       |                       |

<sup>a</sup> Only ten phyla and twenty genera most significantly affected by soil EC  $P < 0.001$  and with the lowest p values obtained are given, <sup>b</sup> The expected values of the Kruskal-Wallis test for each feature obtained with aldex.kw argument with converted sequence data using the centered log-ratio transform test returned by the aldex.clr argument ALDEx2 package.
