# Supplementary material for: Bacterial Communities in Alkaline Saline Soils Amended with Young Maize Plants or Its (Hemi)Cellulose Fraction
Source: MDPI journal article supplement (doi:10.3390/microorganisms9061297), 2021-06-15
Supplement: s1 [file s1]

**Table S4.** Effect of soil (EC 1.9 dS m<sup>-1</sup>, EC 17.3 dS m<sup>-1</sup>, 33.4 dS m<sup>-1</sup>), time (1, 3, 7 and 14 days of aerobic incubation) and their interaction on the soil bacterial community in the young maize plants and neutral detergent fibre (NDF) amended soil using a perMANOVA analysis with the sequence counts converted to centered-log ratio transformation with ALDEx2 package [39].

| Factor                                                        | NDF treatment <sup>1</sup> |                   | Young maize plants |                   |
|---------------------------------------------------------------|----------------------------|-------------------|--------------------|-------------------|
|                                                               | F value                    | <i>p</i> Value    | F value            | <i>p</i> Value    |
| Phyla                                                         |                            |                   |                    |                   |
| Soil                                                          | 1.309                      | 0.175             | 2.432              | <b>&lt; 0.001</b> |
| Time                                                          | 0.989                      | 0.496             | 1.470              | 0.086             |
| Interaction                                                   | 0.888                      | 0.661             | 1.014              | 0.413             |
| All taxonomic groups assigned to the level of bacterial genus |                            |                   |                    |                   |
| Soil                                                          | 1.103                      | 0.139             | 1.987              | <b>&lt; 0.001</b> |
| Time                                                          | 1.113                      | 0.055             | 1.074              | 0.222             |
| Interaction                                                   | 1.051                      | 0.227             | 0.963              | 0.610             |
| All operational taxonomic units (OTUs)                        |                            |                   |                    |                   |
| Soil                                                          | 1.041                      | <b>&lt; 0.012</b> | 1.176              | <b>&lt; 0.001</b> |
| Time                                                          | 1.014                      | 0.230             | 1.056              | 0.058             |
| Interaction                                                   | 1.007                      | 0.300             | 1.012              | 0.228             |

<sup>1</sup> NDF: natural detergent fibre, <sup>2</sup> *p*-values are based on 999 permutations, and bold values indicate a significant effect.
